# Supplementary material
Source: Springer Nature journal article supplement (https://www.springermedizin.de/resource/supplementary/12879_2011_1607_MOESM1_ESM.pdf/9442888)
Supplement: MOESM1 [file 9442888]

**TB diagnosed**  
in TB clinic  
and patient  
referred for  
ART

$\alpha_1$

**Enrolment in**  
ART clinic

$\alpha_2$

Start ART

**Enrolment in**  
ART clinic:  
**TB diagnosed**  
during pre-  
ART screening

$\beta$
